# Supplementary material for: Interferon lambda 4 can directly activate human CD19+ B cells and CD8+ T cells
Source: Life Sci Alliance. 2020 Nov 6;4(1):e201900612. doi: 10.26508/lsa.201900612 (PMC7668538; doi:10.26508/lsa.201900612)
Supplement: Supplementary file 1 [file LSA-2019-00612_TableS1.xlsx]

## Sheet: Sheet1
	Reagent or Resource	Source	Identifier
	Antibodies
	FITC Mouse Anti-Human CD8 (Clone RPA-T8)	BD Bioscience	561947
	Purified Mouse Anti-Total Stat1 (N-terminus) (Clone 1)	BD Bioscience	610116
	Purified anti-human IL-10 (Clone JES3-9D7)	Biolegend	501402
	Biotin anti-human IL-10(Clone JES3-12G8)	Biolegend	501502
	Purified anti-human IFNg(Clone MD-1)	Biolegend	507502
	Biotin anti-human IFNg (Clone 4S-B3)	Biolegend	502504
	Alexa Fluor 647 anti-human CD3 (Clone UCHT1)	Biolegend	300416
	Brilliant Violet 711 anti-human CD16 (Clone 3G8)	Biolegend	302043
	Brilliant Violet 785 anti-human CD197 (Clone G043H7)	Biolegend	353230
	FITC anti-human CD45RA (Clone HI100)	Biolegend	304106
	PE anti-human CD19 (Clone SJ25C1)	Biolegend	363004
	FITC anti-human CD69 Antibody	Biolegend	310903
	FITC mouse IgG1,k Isotype control MOPC-21	Biolegend	400110
	PE mouse IgG1 ,k Isotype Control (clone MOPC-21)	Biolegend	400114
	Alexa Fluor 700 anti-human CD127 (IL-7R)(A019D5) Antibody	Biolegend	351343
	APC/Cy7 anti-human CD366 (Tim-3) (F38-2E2) Antibody	Biolegend	345025
	Brilliant Violet 421ª anti-mouse/human KLRG1 (MAFA) (2F1/KLRG1) Antibody	Biolegend	138413
	Brilliant Violet 510ª anti-human CD39 (A1) Antibody	Biolegend	328219
	Brilliant Violet 605ª anti-human CD161 (HP-3G10) Antibody	Biolegend	339915
	Brilliant Violet 650ª anti-human CD45RO(UCHL1) Antibody	Biolegend	304231
	Brilliant Violet 785ª anti-human CD279 (PD-1)(EH12.2H7) Antibody	Biolegend	329929
	FITC anti-human CD244 (2B4) (02-69) Antibody	Biolegend	393509
	PE anti-mouse CD4 (GK1.5) Antibody	Biolegend	100407
	PE anti-human CD66b Antibody	Biolegend	392904
	PE/Cy7 anti-human CD3 (UCHT1) Antibody	Biolegend	300419
	PE/Dazzleª 594 anti-human CD57 (HNK-1) Antibody	Biolegend	359619
	PerCP/Cy5.5 anti-human CD160 (BY55) Antibody	Biolegend	341209
	Phospho-Stat1 (Tyr701) (Clone 58D6)	Cell Signaling	9167
	CD8 Mouse anti-Human, BUV496, ( RPA-T8)	FisherScientific	BDB564805
	IRDye 800CW anti-rabbit IgG	LICOR	926-32211
	IRDye 680RD anti-mouse IgG	LICOR	926-68070
	Monoclonal Anti-B-Actin antibody	SIGMA	A5441
	Alexa Fluor 647 Goat anti-rabbit IgG (H+L)	ThermoFisherScientific	A21244
	CD223 (LAG-3) Monoclonal Antibody (3DS223H), APC	ThermoFisherScientific	17-2239-42
	Anti-CD3 (2GV6)	ROCHE TISSUE DIAGNOSTICS	790-4341
	Anti-PD1(NAT105)	ROCHE TISSUE DIAGNOSTICS	760-4895
	Chemicals and recombinant proteins
	BD Phosflow Perm Buffer III	BD Bioscience	558050
	HRP Streptavidine	Biolegend	405210
	Intracellular Staining Permeabilization Wash Buffer	Biolegend	421002
	DNase	Sigma	D5025
	Fetal Bovine Serum	Gibco	10270106
	Albumin CSL 20%	CSL Behring AG, Bern	Medical product
	CpG ODN2006	InvivoGen	tlrl-2006-1
	IFNL1	Peprotech	AF-300-02L
	IFNa (Roferon-A)	Roche	Medical product
	Secoll Human	Seraglob	L1412
	SigmanFAST OPD	Sigma	P9187
	Bovine Serum Albumin	SIGMA	A9647
	Dimethyl sulfoxide (DMSO)	SIGMA	D8418
	RPMI glucose free	ThermoFisherScientific	11879020
	Pennicillin-Streptomycin	ThermoFisherScientific	15070063
	Rabbit IgG Isotype Control	ThermoFisherScientific	10500C
	fMLP	Sigma-Aldrich	F3506
	Assays
	IgG (Total) Human ELISA Kit	ThermoFisherScientific	88-50550-22
	DNeasy Blood & Tissue Kit	Qiagen	69504
	NucleoSpin RNA	Macherey-Nagel AG	740984
	FastStart Universal SYBR Green Master	SIGMA	4913914001
	Taqman Universal PCR Master Mix No AmpErase UNG	ThermoFisherScientific	4324018
	MultiScribeTM Reverse Transcriptase	Applied BiosystemsTM	4308228
	U-PLEX Human 11 plex Biomarker Group 1 Assays (IL17A, IL1b, TNFa, IFNg, IL6, GM-CSF, IL10,L17E, IL17F, IL21, IL22)	MSD	K15067L-2
